# Supplementary material for: Friedreich's Ataxia (GAA)n•(TTC)n Repeats Strongly Stimulate Mitotic Crossovers in Saccharomyces cerevisae
Source: PLOS journal article supplement (doi:10.1371/journal.pgen.1001270), 2011-01-13
Supplement: S2 (10.1371/journal.pgen.1001270.s002) [file journal.pgen.1001270.s002]

Table S1. Genotypes of haploid strains

| Strain name | Genotype1 | Construction or reference2 |
| --- | --- | --- |
| Haploid derivatives of W303a | | |
| MAB1 | *MAT*α *ade2-1 leu2-3,112 can1-100 ura3-1 trp1-1 his3-11,15 V9229::HYG V261553::HIS3 RAD5* | Barbera and Petes [4] |
| HMK151 | *MAT*α *ade2-1 leu2-3,112 can1-100 ura3-1 trp1-1 his3-11,15 V9229::HYG V261553::HIS3 RAD5 lys2-::KANMX/URA3* | Replacement of *LYS2* gene in MAB1 by a *KANMX/URA3* cassette |
| HMK160 | *MAT*α *ade2-1 leu2-3,112 can1-100 ura3-1 trp1-1 his3-11,15 V9229::HYG V261553::HIS3 RAD5 lys2-* | Replacement of *KANMX/URA3* cassette with oligonucleotide (*delitto perfetto*) in HMK151 |
| HK9 | *MAT*α *ade2-1 leu2-3,112 can1-100 ura3-1 trp1-1 his3-11,15 V9229::HYG V115902::4.5 LYS2 V261553::HIS3 RAD5 lys2-* | Transformation of HMK160 with PCR fragment to insert 4.5 kb *LYS2* gene on chromosome V at position 115902 |
| HK10 | *MAT*α *ade2-1 leu2-3,112 can1-100 ura3-1 trp1-1 his3-11,15 V9229::HYG V115902::4.5 lys2::KANMX/URA3 V261553::HIS3 RAD5 lys2-* | Transformation of HK9 with a DNA fragment containing *KANMX/URA3* sequences with flanking *lys2* sequences |
| HK11 | *MAT*α *ade2-1 leu2-3,112 can1-100 ura3-1 trp1-1 his3-11,15 V9229::HYG V115902::4.5 lys2::(GAA)20 V261553::HIS3 RAD5 lys2-* | Transformation of HK10 with a PCR fragment to replace *KANMX/URA3* with an (GAA)20 tract |
| HK17 | *MAT*α *ade2-1 leu2-3,112 can1-100 ura3-1 trp1-1 his3-11,15 V9229::HYG V115902::4.5 lys2::(GAA)230 V261553::HIS3 RAD5 lys2-* | Transformation of HK10 with a PCR fragment to replace *KANMX/URA3* with an (GAA)230 tract |
| HK20 | *MAT*α *ade2-1 leu2-3,112 can1-100 ura3-1 trp1-1 his3-11,15 V9229::HYG V115902::4.5 lys2::(TTC)20 V261553::HIS3 RAD5 lys2-* | Transformation of HK10 with a PCR fragment to replace *KANMX/URA3* with an (TTC)20 tract |
| HK26 | *MAT*α *ade2-1 leu2-3,112 can1-100 ura3-1 trp1-1 his3-11,15 V9229::HYG V115902::4.5 lys2::(TTC)230 V261553::HIS3 RAD5 lys2-* | Transformation of HK10 with a PCR fragment to replace *KANMX/URA3* with an (TTC)230 tract |
| MD500 | *MAT*α *ade2-1 leu2-3,112 can1-100 trp1-1 his3-11,15 V9229::HYG V115902::4.5 lys2::(GAA)20 V261553::HIS3 RAD5 lys2-* | Transformation of HK11 with a PCR fragment to replace *ura3-1* with *URA3* |
| MD501 | *MAT*α *ade2-1 leu2-3,112 can1-100 trp1-1 his3-11,15 V9229::HYG V115902::4.5 lys2::(GAA)230 V261553::HIS3 RAD5 lys2-* | Transformation of HK17 with a PCR fragment to replace *ura3-1* with *URA3* |
| MD502 | *MAT*α *ade2-1 leu2-3,112 can1-100 trp1-1 his3-11,15 V9229::HYG V115902::4.5 lys2::(TTC)20 V261553::HIS3 RAD5 lys2-* | Transformation of HK20 with a PCR fragment to replace *ura3-1* with *URA3* |
| MD503 | *MAT*α *ade2-1 leu2-3,112 can1-100 trp1-1 his3-11,15 V9229::HYG V115902::4.5 lys2::(TTC)230 V261553::HIS3 RAD5 lys2-* | Transformation of HK26 with a PCR fragment to replace *ura3-1* with *URA3* |
| PLS2 | *MAT*a *ade2-1 leu2-3,112 can1-100 ura3-1 trp1-1 his3-11,15 V9229::HYG V261553::LEU2 RAD5* | Lee *et al.* [1] |
| WXT20 | *MAT*a *ade2-1 leu2-3,112 can1-100 trp1-1 his3-11,15 V115902::1.2 lys2::(TTC)20 V9229::HYG V261553::LEU2 RAD5* | Transformation of PSL2 with a PCR fragment (derived from MD502) containing *URA3* gene and (TTC)20 tract |
| WXT21 | *MAT*a *ade2-1 leu2-3,112 can1-100 trp1-1 his3-11,15 V115902::1.2 lys2::(TTC)230 V9229::HYG V261553::LEU2 RAD5* | Transformation of PSL2 with a PCR fragment (derived from MD503) containing *URA3* gene and (TTC)230 tract |
| WXT22 | *MAT*a *ade2-1 leu2-3,112 can1-100 trp1-1 his3-11,15 V115902::1.2 lys2::(GAA)20 V9229::HYG V261553::LEU2 RAD5* | Transformation of PSL2 with a PCR fragment (derived from MD500) containing *URA3* gene and (GAA)20 tract |
| WXT23 | *MAT*a *ade2-1 leu2-3,112 can1-100 trp1-1 his3-11,15 V115902::1.2 lys2::(GAA)230 V9229::HYG V261553::LEU2 RAD5* | Transformation of PSL2 with a PCR fragment (derived from MD501) containing *URA3* gene and (GAA)230 tract |
| WXT30 | *MAT*a *ade2-1 leu2-3,112 can1-100 ura3-1 trp1-1 his3-11,15 V115902::1.2 lys2::(TTC)20 V9229::HYG V261553::LEU2 RAD5* | Transformation of WXT20 with a PCR fragment (derived from PSL2) containing *ura3-1* gene |
| WXT31 | *MAT*a *ade2-1 leu2-3,112 can1-100 ura3-1 trp1-1 his3-11,15 V115902::1.2 lys2::(TTC)230 V9229::HYG V261553::LEU2 RAD5* | Transformation of WXT21 with a PCR fragment (derived from PSL2) containing *ura3-1* gene |
| WXT32 | *MAT*a *ade2-1 leu2-3,112 can1-100 ura3-1 trp1-1 his3-11,15 V115902::1.2 lys2::(GAA)20 V9229::HYG V261553::LEU2 RAD5* | Transformation of WXT22 with a PCR fragment (derived from PSL2) containing *ura3-1* gene |
| WXT33 | *MAT*a *ade2-1 leu2-3,112 can1-100 ura3-1 trp1-1 his3-11,15 V115902::1.2 lys2::(GAA)230 V9229::HYG V261553::LEU2 RAD5* | Transformation of WXT23 with a PCR fragment (derived from PSL2) containing *ura3-1* gene |
| MAB4 | *MAT*a *ade2-1 leu2-3,112 his3-15 ura3-1 trp1-1 can1Δ::SUP4-o V9229::KANMX V261553::LEU2 RAD5* | Barbera and Petes [4] |
| MD510 | *MAT*a *ade2-1 leu2-3,112 his3-15 ura3-1 trp1-1 can1Δ::SUP4-o V115902::4.5 lys2::(GAA)230 V9229::KANMX V261553::LEU2 lys2-RAD5* | Spore derived from MD506 (MAB4 x MD501) |
| MD512 | *MAT*a *ade2-1 leu2-3,112 his3-15 ura3-1 trp1-1 can1Δ::SUP4-o V115902::4.5 lys2::(TTC)230 V9229::KANMX V261553::LEU2 lys2-RAD5* | Spore derived from MD508 (MAB4 x MD503) |
| Haploid derivatives of YJM789 | | |
| PLS5 | *MAT* *ade2-1 ura3 can1Δ::SUP4-o gal2 ho::hisG* | Lee *et al.* [1] |
| WXT10 | *MAT* *ade2-1 can1Δ::SUP4-o V115902::1.2 lys2::(TTC)20 gal2 ho::hisG* | Transformation of PSL5 with a PCR fragment (derived from MD502) containing *URA3* gene and (TTC)20 tract |
| WXT11 | *MAT* *ade2-1 can1Δ::SUP4-o V115902::1.2 lys2::(TTC)230 gal2 ho::hisG* | Transformation of PSL5 with a PCR fragment (derived from MD503) containing *URA3* gene and (TTC)230 tract |
| WXT12 | *MAT* *ade2-1 can1Δ::SUP4-o V115902::1.2 lys2::(GAA)20 gal2 ho::hisG* | Transformation of PSL5 with a PCR fragment (derived from MD500) containing *URA3* gene and (GAA)20 tract |
| WXT13 | *MAT* *ade2-1 can1Δ::SUP4-o V115902::1.2 lys2::(GAA)230 gal2 ho::hisG* | Transformation of PSL5 with a PCR fragment (derived from MD501) containing *URA3* gene and (GAA)230 tract |
|  | | |
